# Supplementary material
Source: Springer Nature journal article supplement (https://www.springermedizin.de/resource/supplementary/12879_2005_211_MOESM2_ESM.pdf/9448422)
Supplement: MOESM2 [file 9448422]

| Organism/Accession#             | p-bhenfa                     | n-bhenfla                 |     | n-bhenr          | p-benr1                    |
|---------------------------------|------------------------------|---------------------------|-----|------------------|----------------------------|
| B. henselae L35101              | TCTTCGTTTCTCTTTCTTCAGATGATG- | ATCCCAAGCCTTCTGGC         | *** | GGCTTGTAGCTCAGTT | <u>GGTT</u> AGAGCGCGCGCTTG |
| B. clarridgeiae AF167989        | C....A.....                  | -....T.....               | 134 |                  |                            |
| B. koehlerae AF312490           | .....                        | -.....T....               | 169 |                  |                            |
| B. doshiae AF442954             | .....                        | -.....                    | 164 |                  |                            |
| B. quintana AF368396            | C.....                       | -.....G...                | 137 | .....C.....      |                            |
| B. bacilliformis AJ422180       | C.....A.....                 | -.....                    | 191 |                  |                            |
| B. birtlesii AY116640           | C....A.....C.....            | -.....AA..                | 164 |                  |                            |
| B. schoenbuchensis AY116639     | C....A.....C.....            | -.....AA..                | 179 |                  |                            |
| B. bovis AY116638               | C.....C.....                 | -.....A...                | 187 |                  |                            |
| B. grahamii AJ269789            | .....                        | -.....                    | 249 |                  |                            |
| B. vinsonii berkhoffii AF167988 | C.....                       | -.....T....               | 240 |                  |                            |
| B. vinsonii arupensis AF312504  | C.....                       | -.....                    | 267 |                  |                            |
| B. elizabethae L35103           | .....                        | -.....                    | 221 |                  |                            |
| B. taylorii AJ269788            | .....                        | -.....                    | 183 |                  |                            |
| B. tribocorum AF312505          | .....                        | G.....                    | 219 |                  |                            |
| B. alsatica AF312506            | .....                        | -.....                    | 172 |                  |                            |
| Brucella melientensis           | C.....                       | TTGTTGA-T.G.TC.CGGGCCGTA. |     |                  | .....A.A.....              |
